# Supplementary material
Source: PubMed Central journal article supplement (PMC10564477)
Supplement: media-1.pdf [file media-1.pdf]

1 Host and viral determinants of airborne transmission of SARS-CoV-2 in the Syrian hamster.  
2  
3

4 Julia R. Port\*<sup>1</sup>, Dylan H. Morris<sup>2</sup>, Jade C. Riopelle<sup>1</sup>, Claude Kwe Yinda<sup>1</sup>, Victoria A. Avanzato<sup>1</sup>, Myndi G.  
5 Holbrook<sup>1</sup>, Trenton Bushmaker<sup>1</sup>, Jonathan E. Schulz<sup>1</sup>, Taylor A. Saturday<sup>1</sup>, Kent Barbian<sup>3</sup>, Colin A.  
6 Russell<sup>4</sup>, Rose Perry-Gottschalk<sup>5</sup>, Carl I. Shaia<sup>6</sup>, Craig Martens<sup>3</sup>, James O. Lloyd-Smith<sup>2</sup>, Robert J.  
7 Fischer<sup>1</sup>, Vincent J. Munster<sup>#1</sup>

8 1. *Laboratory of Virology, Division of Intramural Research, National Institute of Allergy and Infectious*  
9 *Diseases, National Institutes of Health, Hamilton, MT, USA*

10 2. *Department of Ecology and Evolutionary Biology, University of California, Los Angeles, CA, USA*

11 3. *Rocky Mountain Research and Technologies Branch, Division of Intramural Research, National*  
12 *Institute of Allergy and Infectious Diseases, National Institutes of Health, Hamilton, MT, USA*

13 4. *Department of Medical Microbiology | Amsterdam University Medical Center, University of*  
14 *Amsterdam*

15 5. *Rocky Mountain Visual and Medical Arts Unit, Research Technologies Branch, Division of*  
16 *Intramural Research, National Institute of Allergy and Infectious Diseases, National Institutes of*  
17 *Health, Hamilton, MT, USA*

18 6. *Rocky Mountain Veterinary Branch, Division of Intramural Research, National Institute of Allergy*  
19 *and Infectious Diseases, National Institutes of Health, Hamilton, MT, USA*

20 Corresponding author: Vincent J. Munster. [vincent.munster@nih.gov](mailto:vincent.munster@nih.gov)

21  
22 **This PDF file includes:**

23  
24 Figures S1 to S7  
25 Table S1  
26 SI References

27  
28 **Other supporting materials for this manuscript include the following:**

29 SI Mathematical Model Methods Appendix  
30  
31

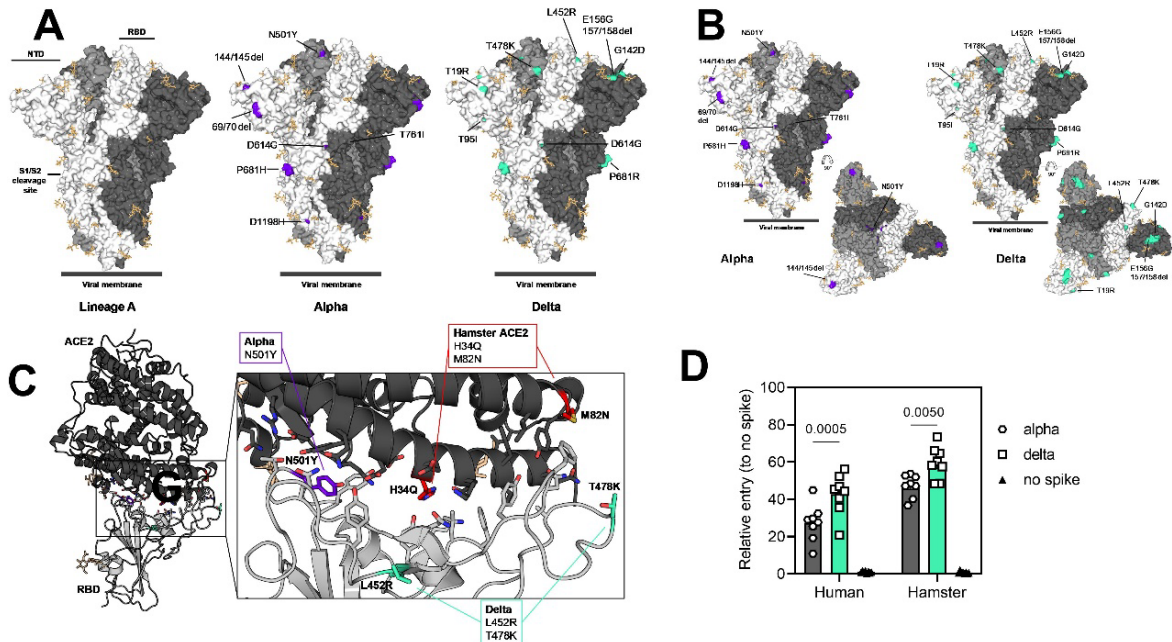

32  
 33 **Figure S1. Alpha and Delta variant spike interaction with hamster ACE2.** A/B. Mutations observed in  
 34 the SARS-CoV-2 Alpha and Delta VOCs are highlighted on the structure of SARS-CoV-2 spike (PDB  
 35 6ZGE, [1]). The spike trimer is depicted by surface representation with each protomer colored a different  
 36 shade of gray. The residues at the positions of the spike protein mutations observed in the Alpha and  
 37 Delta SARS-CoV-2 VOCs are colored purple (Alpha) and teal green (Delta) and annotated. N-linked  
 38 glycans are shown as light, orange-colored sticks. C. The structure of the Alpha VOC RBD and human  
 39 ACE2 complex (PDB 7EKF [2]) is depicted with cartoon representation. ACE2 is colored dark gray and  
 40 the RBD is colored light gray. N-linked glycans are shown as light, orange-colored sticks. A box reveals a  
 41 close-up view of the RBD-ACE2 binding interface. Side chains of the residues participating in the  
 42 interaction, as identified and described by Lan, et al. [3] are shown as sticks. The residues within the RBD  
 43 that are mutated in the Alpha and Delta VOCs are colored purple (Alpha, N501Y) and teal green (Delta,  
 44 L452R and T478K). Though they do not participate directly in the ACE2 interface, the sidechains of  
 45 residues L452 and T478 are also shown. The residues that differ between human and hamster ACE2  
 46 within the interface are colored red. D. BHK cells expressing either human ACE2 or hamster ACE2 were  
 47 infected with pseudotyped VSV reporter particles with the spike proteins of Alpha or Delta. Relative entry  
 48 to no spike control is depicted. Bar-chart depicting median, 95% CI and individuals, N = 8, ordinary two-  
 49 way ANOVA, followed by Šídák's multiple comparisons test. Abbreviations: RBD, receptor binding  
 50 domain; ACE2, Angiotensin-converting enzyme 2; VOCs, variants of concern.

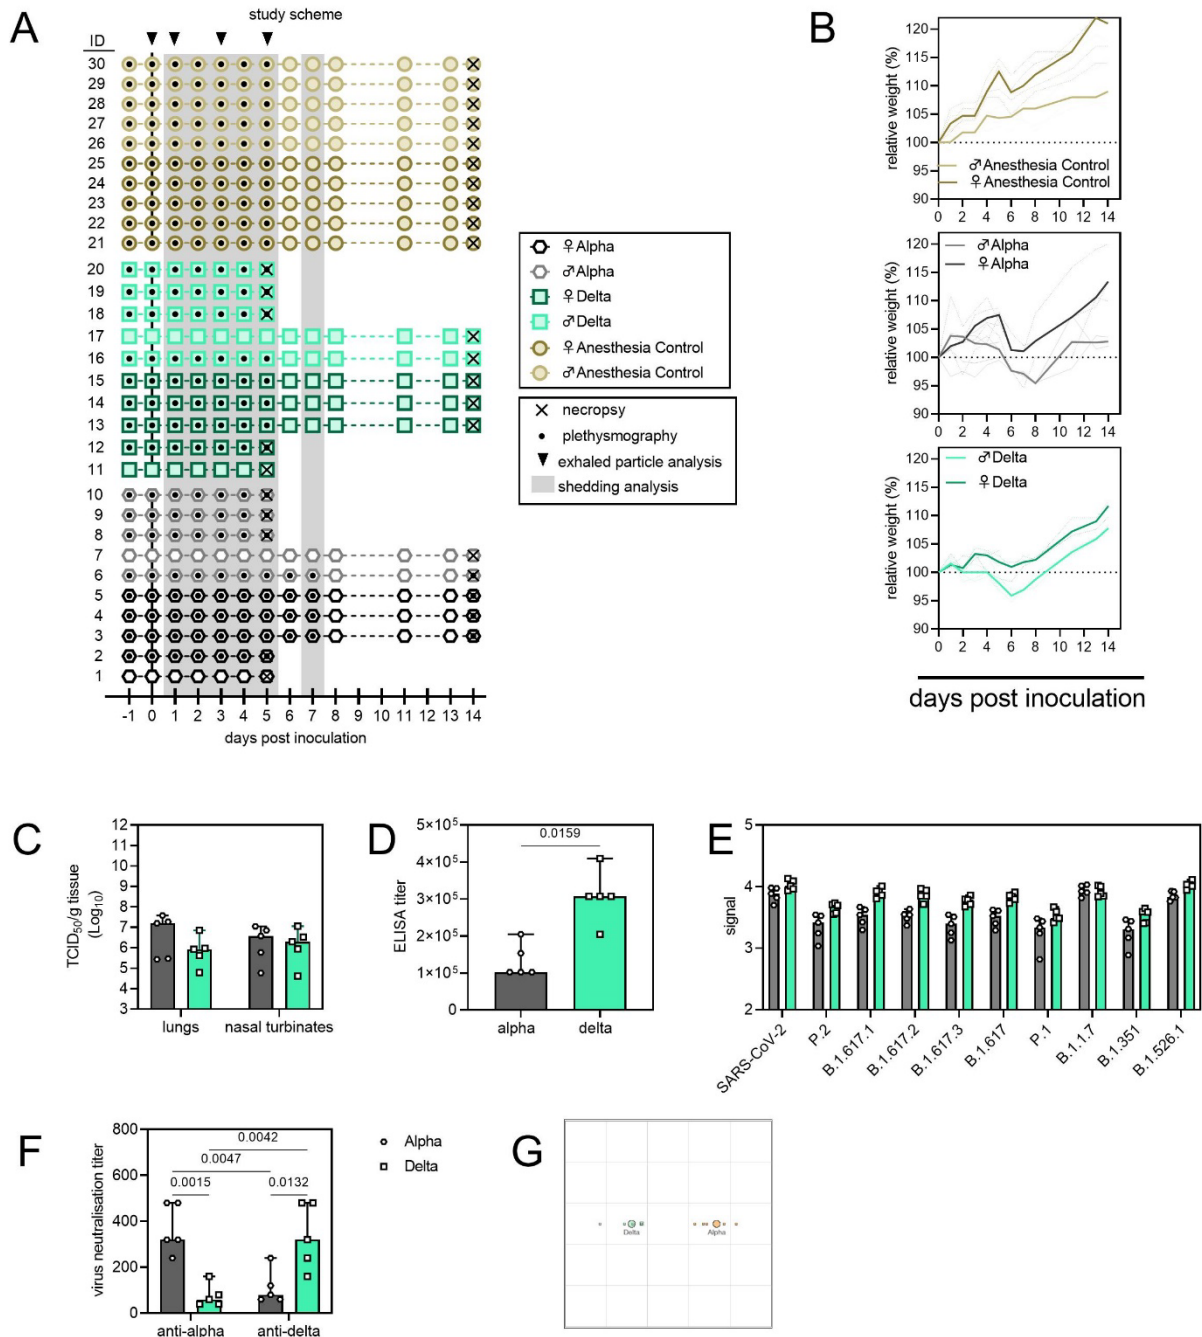

51  
 52 **Figure S2. Schematic overview of inoculation experiment.** **A.** Four-to-six-week-old female and male  
 53 Syrian hamsters (ENVIGO) were inoculated (N = 10 per virus, N = 5 per sex) with 10<sup>3</sup> TCID<sub>50</sub> intranasally  
 54 (IN) with either SARS-CoV-2 Alpha or Delta variants, or no virus (anaesthesia controls). At five days post  
 55 inoculation, five hamsters for each group were euthanized, and tissues were collected. The remaining 5  
 56 animals for each route were euthanized at 14 DPI for disease course assessment and shedding analysis.  
 57 For the control group no day 5 necropsy was performed. Schematic indicates when oropharyngeal swabs  
 58 were collected, when whole body plethysmography was performed, when air sampling was conducted and  
 59 when exhaled particle profiles were determined. **B.** Relative weight loss. Graph shows median (thick line)  
 60 and individuals, colors indicate sex. **C.** Viral load as measured by infectious titers in lungs and nasal  
 61 turbinates collected at day 5 post inoculation. Bar-chart depicting median, 96% CI and individuals, N = 5,

62 ordinary two-way ANOVA, followed by Šídák's multiple comparisons test. **D.** Binding antibodies against  
63 spike protein of SARS-CoV-2 in serum obtained 14 days post inoculation. Bar-chart depicting median, 96%  
64 CI and individuals, N = 5, Mann-Whitney test. ELISA was performed once. **E.** Binding antibodies against  
65 spike protein of various variants of concern analyzed by MesoPlex. Bar-chart depicting median, 96% CI  
66 and individuals, N = 5 ordinary two-way ANOVA, followed by Šídák's multiple comparisons test. Assay was  
67 performed once. **F.** Virus neutralization titers against Alpha and Delta, depicted as reciprocal titers. N = 5,  
68 ordinary two-way ANOVA, followed by Tukey's multiple comparisons test. Assay was performed once. Grey  
69 = Alpha, teal = Delta, beige = anesthesia control. **G.** Antigenic map [4] depicting the cross-reactivity based  
70 on neutralization. The spacing between grid lines is 1 unit of antigenic distance, corresponding to a twofold  
71 dilution of serum in the neutralization assay. The resulting antigenic distance is depicted between Alpha  
72 and Delta. P-values are indicated where significant. Abbreviations: ELISA, Enzyme-linked immune-  
73 absorbent Assay.

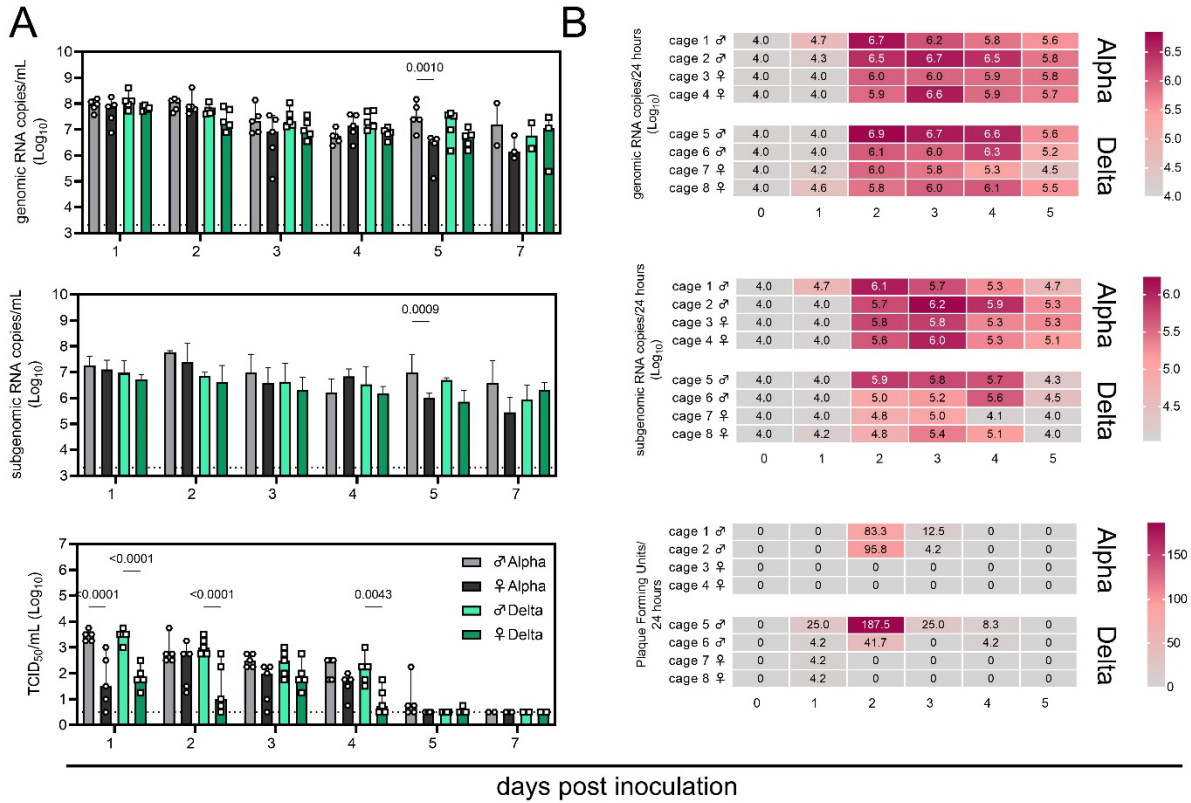

74  
75  
76  
77  
78  
79  
80  
81  
82  
83  
84  
85  
86  
87

**Figure S3. Window of Alpha and Delta variant shedding profiles.** Syrian hamsters were inoculated with  $10^3$  TCID<sub>50</sub> via the intranasal route with Alpha or Delta. **A.** Viral load as measured by gRNA, sgRNA and infectious titers in oropharyngeal swabs collected at days 1, 2, 3, 4, 5, and 7 post inoculation. Bar-chart depicting median, 96% CI and individuals, N = 5, ordinary two-way ANOVA, followed by Šídák's multiple comparisons test. Dotted line = limit of detection. Grey = Alpha, teal = Delta, dark = female, light = males **B.** Virus isolated from cage air over 24 h intervals, measured as gRNA, sgRNA and plaque forming units on day 0, 1, 2, 3, 4, and 5. The column marked 1 corresponds to samples taken from 0-24 hours post inoculation. Each cage housed 2 or 3 hamsters. Heatmap depicting individual cages across each day, colours referring to legends on the right. RNA: limit of detection = 4.0, Plaque forming units: limit of detection = 0. **C.** sgRNA sampled from air versus infectious virus sampled from air. Point colour indicates variant: Alpha (grey) or Delta (teal). Sampled sgRNA copies value versus sampled plaques. **D.** Number of estimated sgRNA copies per plaque in samples as a function of day sampled and variant. p-values are indicated where significant. Abbreviations: g, genomic; sg, subgenomic; TCID, Tissue Culture Infectious Dose.

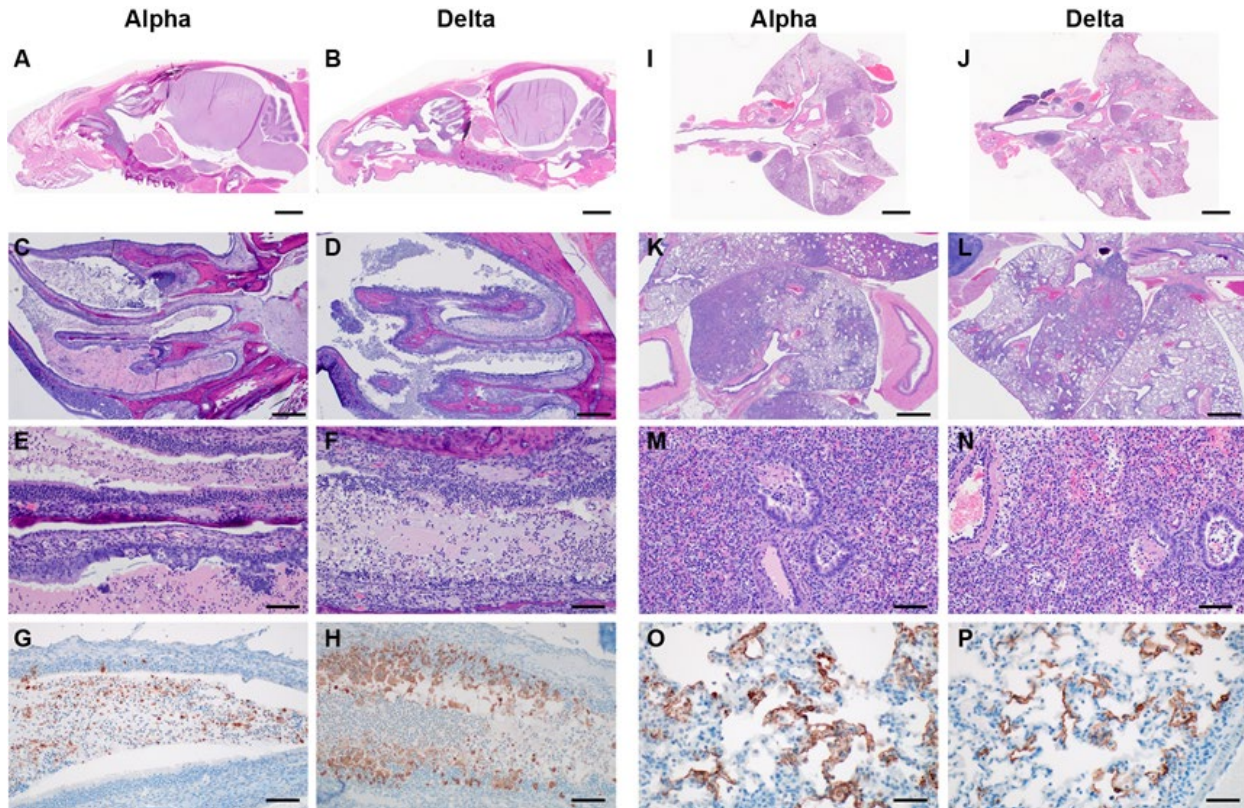

88  
89 **Figure S4. Respiratory tract pathology after SARS-CoV-2 infection with Alpha and Delta.** Syrian  
90 hamsters were inoculated with  $10^3$  TCID<sub>50</sub> via the intranasal route with Alpha or Delta and respiratory  
91 pathology was compared on day 5. **A, B.** Skull, brain, nasal turbinates and cavities, Alpha and Delta variant,  
92 1x HE. **C, D.** Nasal cavities contain an exudate and are lined by inflamed, disrupted and necrotic epithelium,  
93 40x HE. **E, F.** Eroded and ulcerated olfactory epithelium, epithelial micro-abscesses, sloughed epithelial  
94 and inflammatory exudate occupies nasal cavities and recesses, 200x HE. **G, H.** Examples of  
95 immunoreactivity in the exudate of the nasal cavity. There are also rare immunoreactive olfactory epithelial  
96 cells in the Alpha variant sample and numerous immunoreactive epithelial cells in the Delta variant sample.  
97 200x, anti-SARS-CoV-2 IHC. **I, J.** Lung, Alpha and Delta variant, 1x HE. **K, L.** Foci of inflammation across  
98 multiple lobes, 20x HE. **M, N.** Foci of inflammation contain numerous inflammatory cells as well as  
99 hemorrhage, fibrin and edema. Bronchioles contain fibrin, sloughed epithelial and inflammatory cells.  
100 Vessels contain sub-intimal leukocytes and vessel walls are occasionally infiltrated by leukocytes, 200x HE.  
101 **O, P.** Alveolar immunoreactivity, 400x, anti-SARS-CoV-2 IHC. Mainly, severe inflammation and not yet well-  
102 developed interstitial pneumonia were observed. Foci were consolidated but only rarely contained  
103 hyperplastic type II pneumocytes and syncytial cells. The large and mid-caliber bronchioles were frequently  
104 lined by hyperplastic respiratory epithelium mixed with rare singular necrotic cells and transmigrating  
105 leukocytes. Lesions were associated with hemorrhage, fibrin and edema. Vessels also contained sub-  
106 endothelial clusters of leukocytes within the muscular layers and surrounding adventitia. In the nasal  
107 turbinates SARS-CoV-2 was seen in the exudate of the nasal and rarely in olfactory epithelium, regardless  
108 of variant. No sex-specific increases in pathology were observed.

A

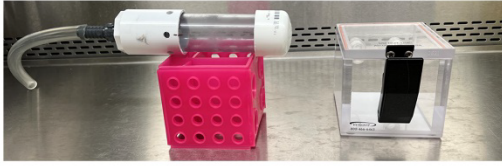

percentage (%)

B

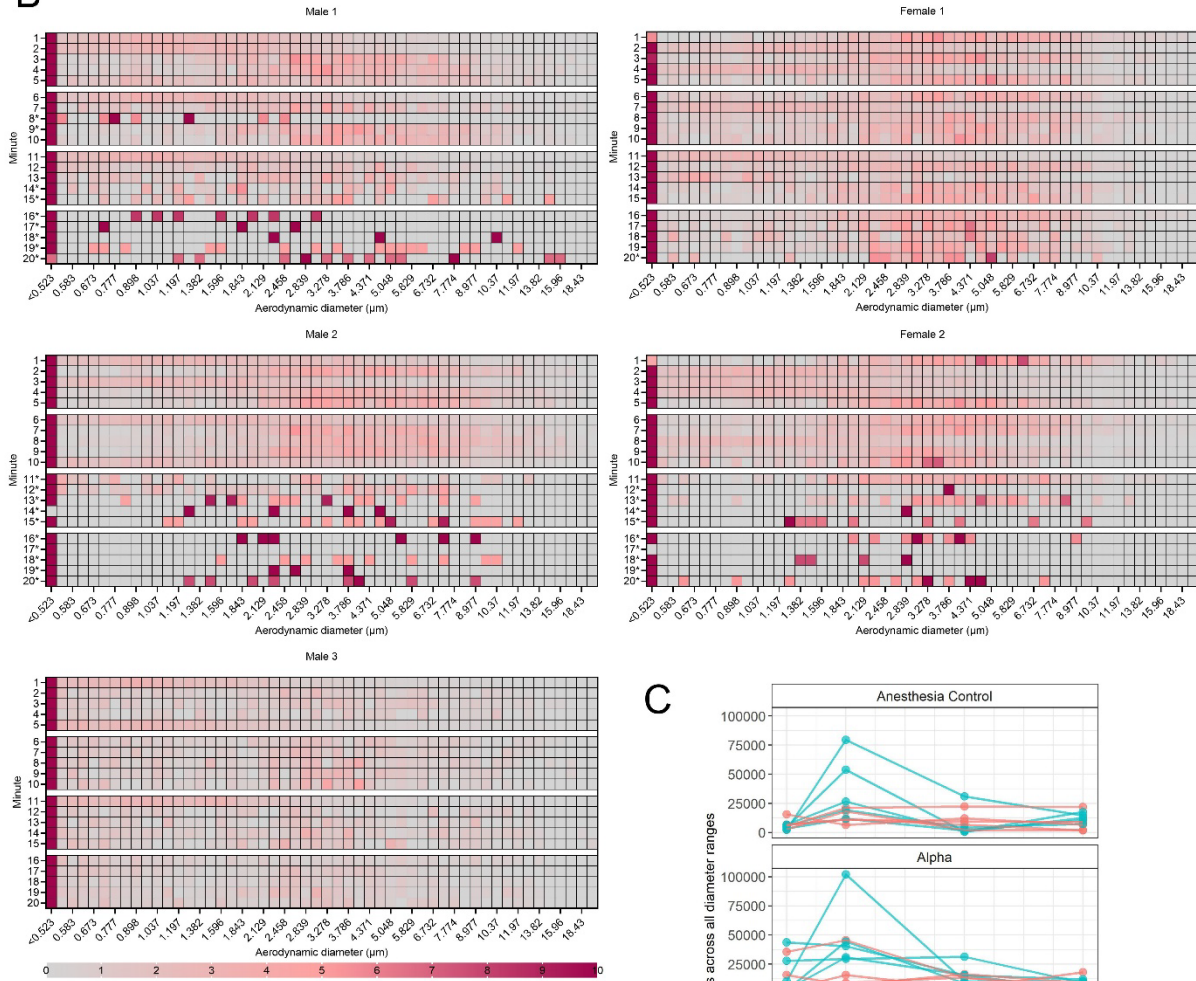

C

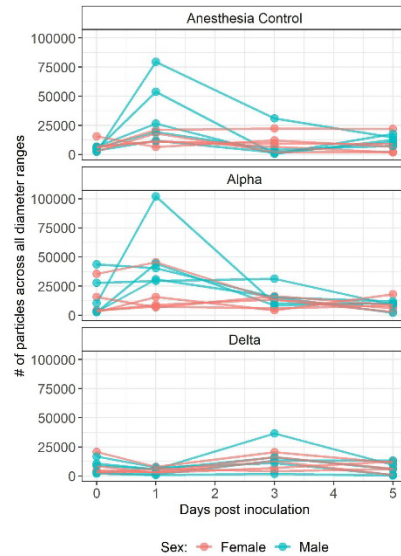

109  
110  
111  
112  
113  
114

**Figure S5. Exhaled particle profiles of Syrian hamsters** **A.** Chambers used to house uninfected hamsters (left) and animals during inoculation experiments (inoculation with Alpha, Delta or control inoculum) (right). **B.** Uninfected healthy animals were used to assess particle profiles in relation to behavior patterns. Five Syrian hamsters were acclimatized to a small tube, in which animal movement was limited and air flow was directly passing the face. For each animal, 5 x 5-minute readings were taken. Heatmap

115 shows the percentage of total particles in each diameter size for 3 male and 2 female animals. \* marks  
116 minutes of low to no activity (sleep). Colors refer to scale below. **C.** Syrian hamsters were inoculated with  
117  $10^3$  TCID<sub>50</sub> via the intranasal route with Alpha (N = 10) or Delta (N = 10). Aerodynamic diameter profile of  
118 exhaled particles was analyzed on day 0, 1, 3, and 5. For each animal (N = 10 in each variant group,  
119 comprising 5 males and 5 females), line graph of the total number of particles by variant and sex indicated  
120 by color (red = female; blue = male).



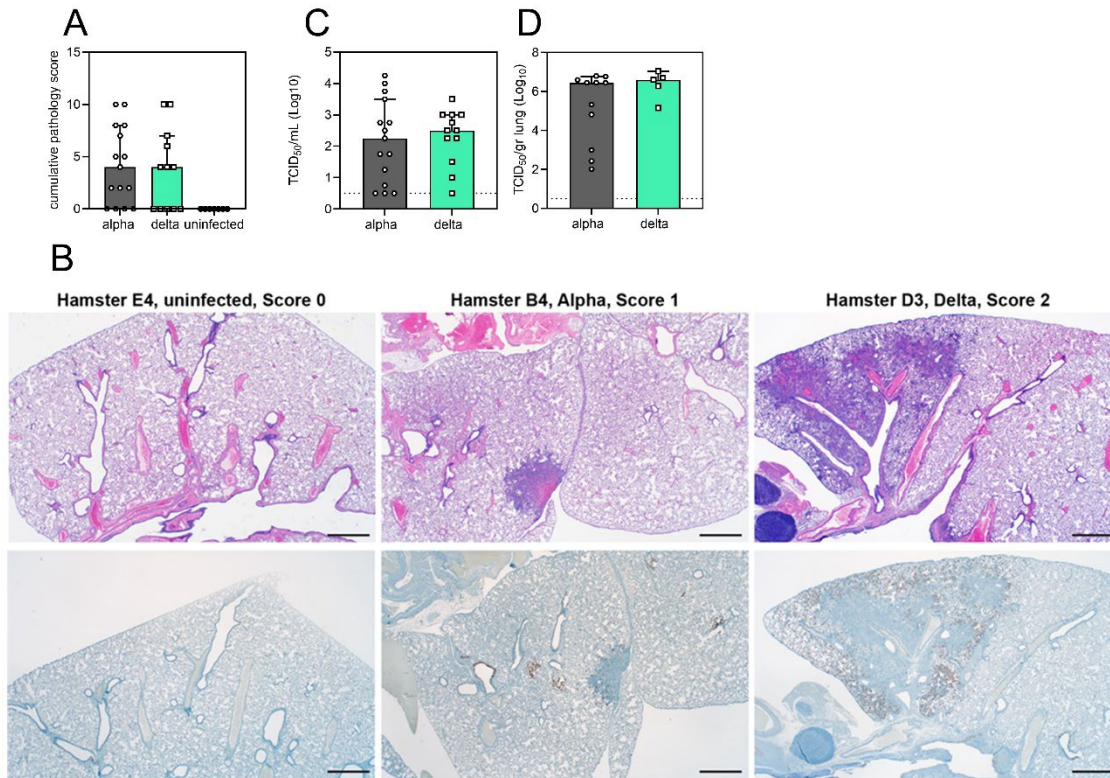

121  
 122 **Figure S6. Airborne competitiveness of Alpha and Delta SARS-CoV-2 variants** **A.** Cumulative  
 123 pathology score of sentinels on day 5 post exposure. Bar-chart depicting median, 96% CI, and  
 124 individuals, Mann-Whitney test. **B.** Lung histologic lesion scores 0, 1, and 2. Score 0, normal lung devoid  
 125 of immunoreactivity. Score 1, a solitary focus of inflammation (circled) surrounded by normal lung.  
 126 Bronchiole (\*) and alveolar (>) immunoreactivity. Score 2, multiple foci of coalescing inflammation  
 127 centered on airways. HE (top row) and anti-SARS-CoV-2 IHC (bottom row). **C, D.** Viral load measured via  
 128 infectious virus titer in swabs and lungs of sentinels on day 5. Bar-chart depicting median, 96% CI, and  
 129 individuals, Mann-Whitney test. Grey = Alpha, teal = Delta, p-values indicated where significant.  
 130 Abbreviations: TCID, Tissue Culture Infectious Dose.

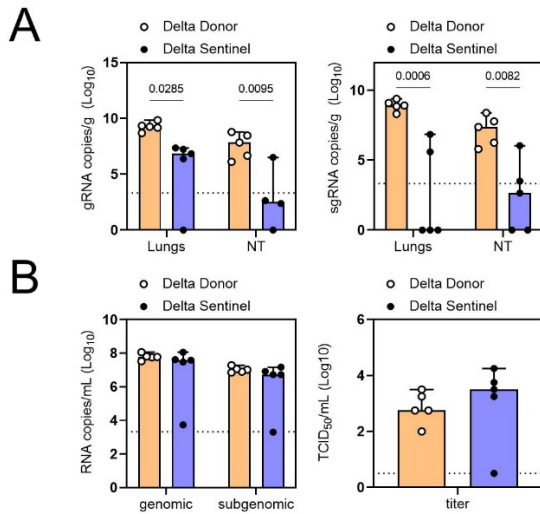

131  
 132 **Figure S7. Early virus shedding in donors and sentinels.** Donor animals were inoculated with Delta  
 133 variant with  $10^3$  TCID<sub>50</sub> via the intranasal route. Sentinels (1:1 ratio) were exposed subsequently at 16.5  
 134 cm distance for 24 h, beginning 24 h after donor exposure. **A.** Organ titers measured by gRNA and  
 135 sgRNA on day 2 post inoculation/exposure. **B.** Respiratory shedding measured by viral load in  
 136 oropharyngeal swabs; measured by gRNA, sgRNA and infectious titers on day 2 post  
 137 inoculation/exposure. Bar-chart depicting median, 96% CI and individuals, N = 5, ordinary two-way  
 138 ANOVA, followed by Šídák's multiple comparisons test and Wilcoxon test. Orange = donors, purple =  
 139 sentinels, p-value shown where significant. Abbreviations: g, genomic; sg, subgenomic; TCID, Tissue  
 140 Culture Infectious Dose.

141 **Table 1: Airborne attack rate of Alpha and Delta SARS-CoV-2 variants.** Donor animals (N = 7) were  
 142 inoculated with either the Alpha or Delta variant and paired together randomly in 7 attack rate scenarios  
 143 (A-G). One day after inoculation, 4-5 sentinels were exposed for a duration of 4 h in an aerosol  
 144 transmission set-up. Percentage of Alpha and Delta detected in oropharyngeal swabs taken at day 2 and  
 145 day 5 post exposure by deep sequencing.

**Percentage reads (%) mapped to Delta**

| Cage | Sentinel | Oral swab day |        |
|------|----------|---------------|--------|
|      |          | 3             | 5      |
| A    | A1       | 0             | 0      |
|      | A2       | 0             | 0      |
|      | A3       | 0             | 0      |
|      | A4       | 0             | 0      |
|      | A5       | 0             | 0      |
| B    | B1       | 0             | 0      |
|      | B2       | 0             | 0      |
|      | B3       |               |        |
|      | B4       | 0             | 0      |
|      | B5       | 97            | 96.667 |
| C    | C1       |               | 96.333 |
|      | C2       |               | 0      |
|      | C3       |               | 96.333 |
|      | C4       | 0             | 0      |
|      | C5       | 97.333        | 96.667 |
| D    | D1       |               |        |
|      | D2       |               | 97     |
|      | D3       | 96.667        | 97     |
|      | D4       |               | 97     |
|      | D5       |               |        |
| E    | E1       | 97            |        |
|      | E2       |               |        |
|      | E3       | 97.333        | 97.333 |
|      | E4       |               |        |
|      | E5       |               | 0      |
| F    | F1       | 0             | 0      |
|      | F2       | 0             | 0      |
|      | F3       | 97            | 90.333 |
|      | F4       | 0             | 10.5   |
|      | F5       | 96.667        | 93.667 |
| G    | G1       |               | 0      |
|      | G2       |               | 97.333 |
|      | G3       |               |        |
|      | G4       |               |        |

146  
 147

148 **SI References**

- 149 1. Wrobel, A.G., et al., *SARS-CoV-2 and bat RaTG13 spike glycoprotein structures inform on virus*  
150 *evolution and furin-cleavage effects*. Nature Structural & Molecular Biology, 2020. **27**(8): p. 763-  
151 767.
- 152 2. Han, P., et al., *Molecular insights into receptor binding of recent emerging SARS-CoV-2 variants*.  
153 Nature Communications, 2021. **12**(1): p. 6103.
- 154 3. Lan, J., et al., *Structure of the SARS-CoV-2 spike receptor-binding domain bound to the ACE2*  
155 *receptor*. Nature, 2020. **581**(7807): p. 215-220.
- 156 4. Smith, D.J., et al., *Mapping the Antigenic and Genetic Evolution of Influenza Virus*. Science, 2004.  
157 **305**(5682): p. 371-376.

158
